# Supplementary material
Source: ML conference proceedings conference paper supplement (https://openaccess.thecvf.com/content/CVPR2021/html/Punnakkal_BABEL_Bodies_Action_CVPR_2021_paper.html)

# samples per action category in Babel 150

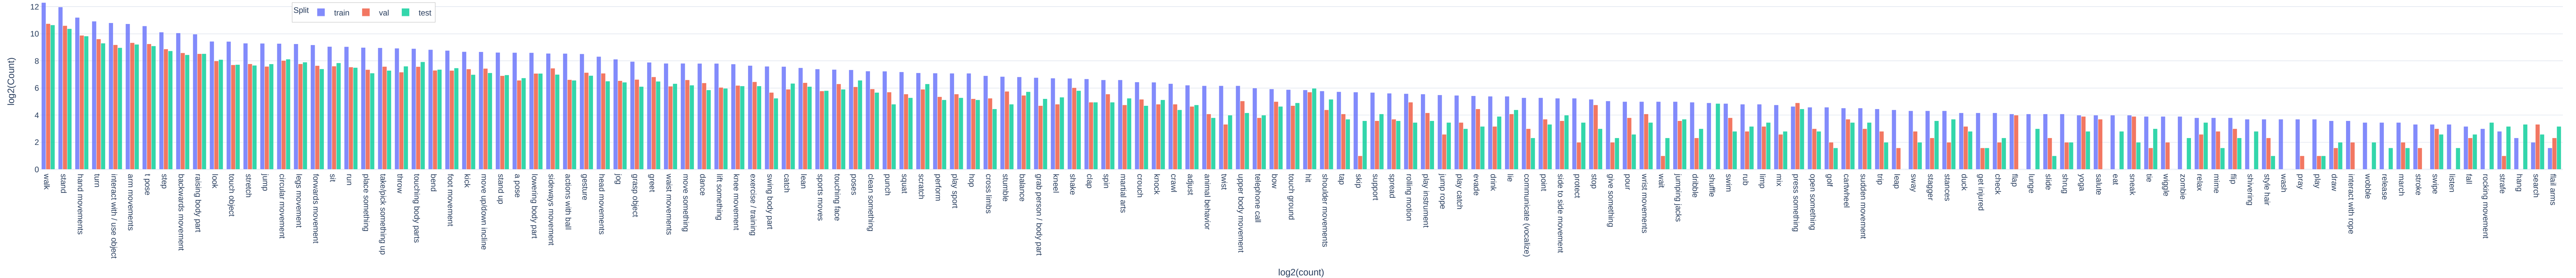

Supplement: Supplementary file 1 [file Punnakkal_BABEL_Bodies_Action_CVPR_2021_supplemental.zip]

Histogram of # samples per action category

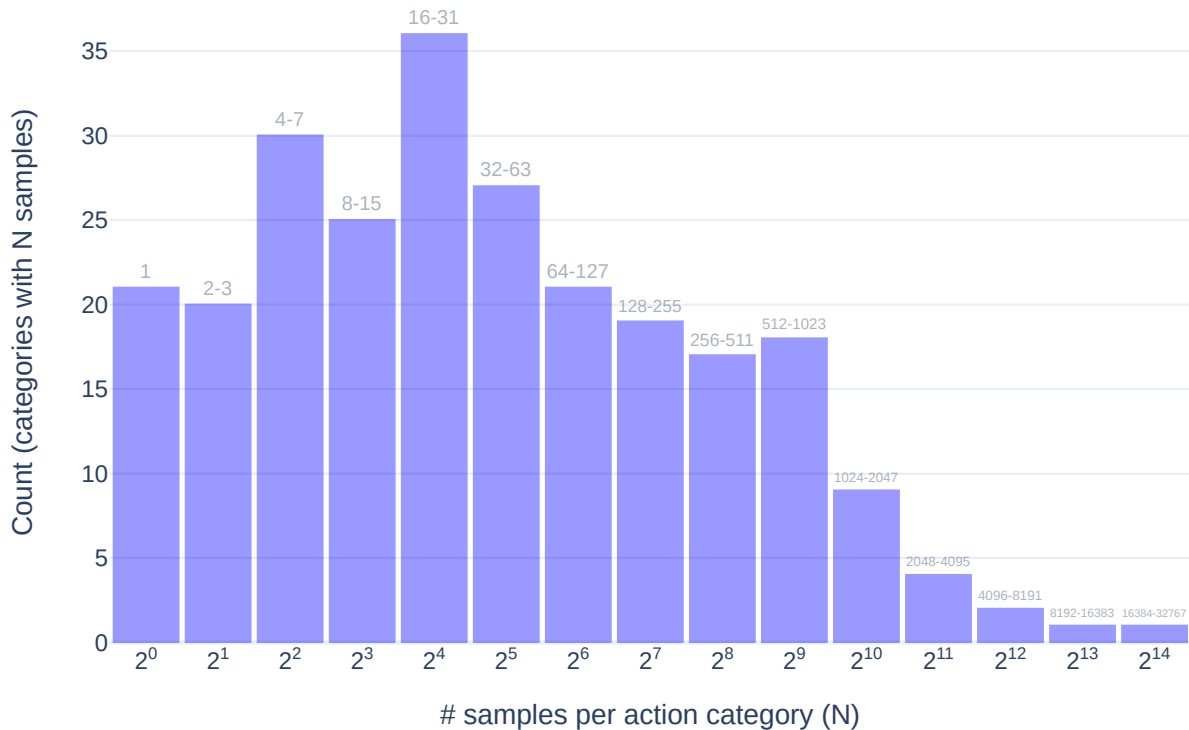

Supplement: Supplementary file 2 [file Punnakkal_BABEL_Bodies_Action_CVPR_2021_supplemental.zip]

# Histogram of duration per action category

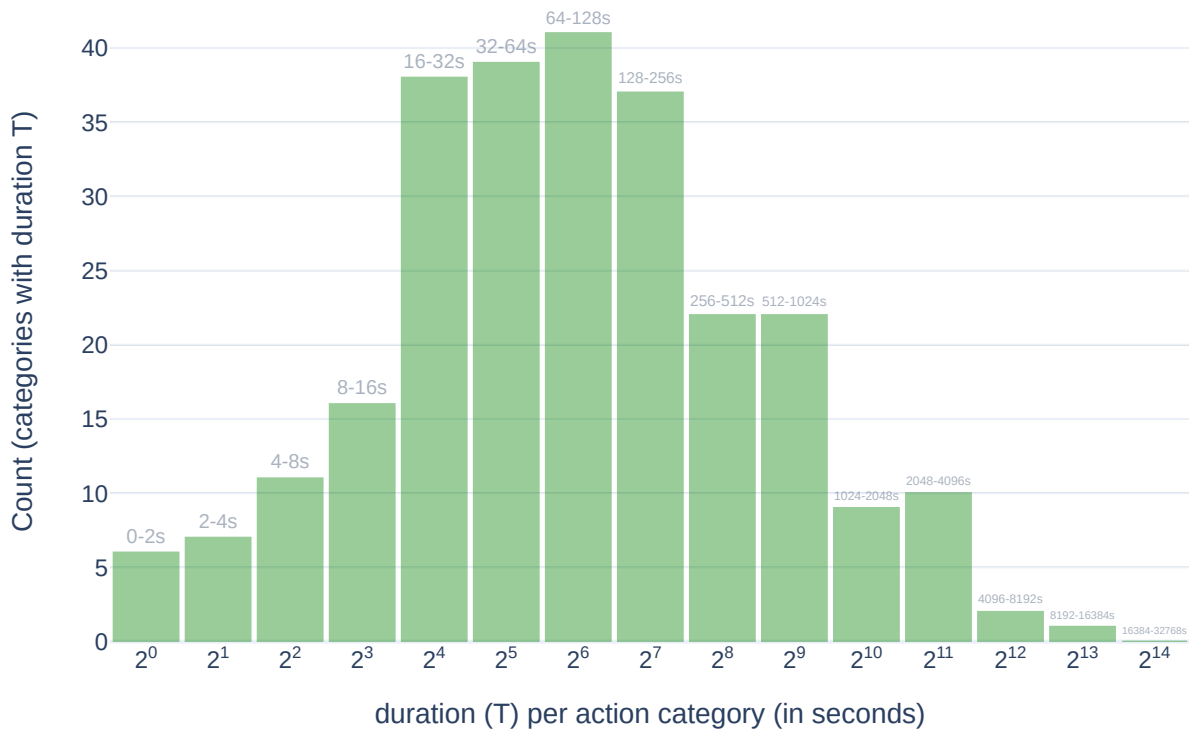

Supplement: Supplementary file 5 [file Punnakkal_BABEL_Bodies_Action_CVPR_2021_supplemental.zip]

$\log_{10}(\# \text{ samples})$  &  $\log_{10}(\text{duration})$  for each action category

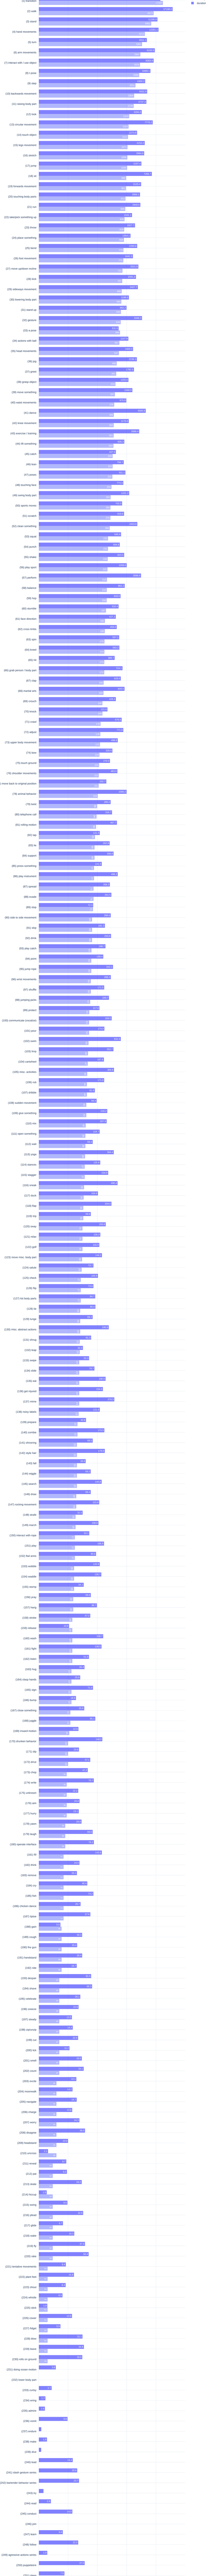

Supplement: Supplementary file 6 [file Punnakkal_BABEL_Bodies_Action_CVPR_2021_supplemental.zip]
